# Supplementary material for: 3D printing of wearable sensors with strong stretchability for myoelectric rehabilitation
Source: Royal Society of Chemistry journal article supplement (doi:10.1039/d4bm01434k), 2025-01-01
Supplement: d4bm01434k1.pdf [file d4bm01434k1.pdf]

## Supporting Information

### 3D printing of wearable sensors with strong stretchability for myoelectric rehabilitation

Jianan Zhan, <sup>a</sup> Yueying Kong, <sup>d</sup> Xi Zhou, <sup>c</sup> Haihuan Gong, <sup>e</sup> Qiwei Chen, <sup>c</sup> Xianlin Zhang, <sup>c</sup>  
Jiankai Zhang, <sup>\*a</sup> Yilin Wang <sup>\*b</sup> and Wenhua Huang <sup>\*a, c, d</sup>

- a. Department of Human Anatomy, School of Basic Medical Sciences Guangdong Medical University, 524000, Zhanjiang, China*
- b. Department of Human Anatomy, College of Basic Medical Science, China Medical University, 110122, Shenyang, China*
- c. Guangdong Provincial Key Laboratory of Medical Biomechanics, National Key Discipline of Human Anatomy, School of Basic Medical Sciences, Southern Medical University, 510515, Guangzhou, China*
- d. Clinical Anatomy & Reproductive Medicine Application Institute, Hengyang Medical School, University of South China, 421001, Hengyang, China*
- e. Department of Periodontics · Guangzhou Key Laboratory of Basic and Applied Research of Oral Regenerative Medicine Affiliated Stomatology Hospital of Guangzhou Medical University · Guangzhou, 510182, China*

*\*. Corresponding author*

E-mail: [huangwenhua2009@139.com](mailto:huangwenhua2009@139.com) (W, Hang)

[20242252@cmu.edu.cn](mailto:20242252@cmu.edu.cn) (Y, Wang)

[zhangjiankai@gdmu.edu.cn](mailto:zhangjiankai@gdmu.edu.cn) (J, Zhang)

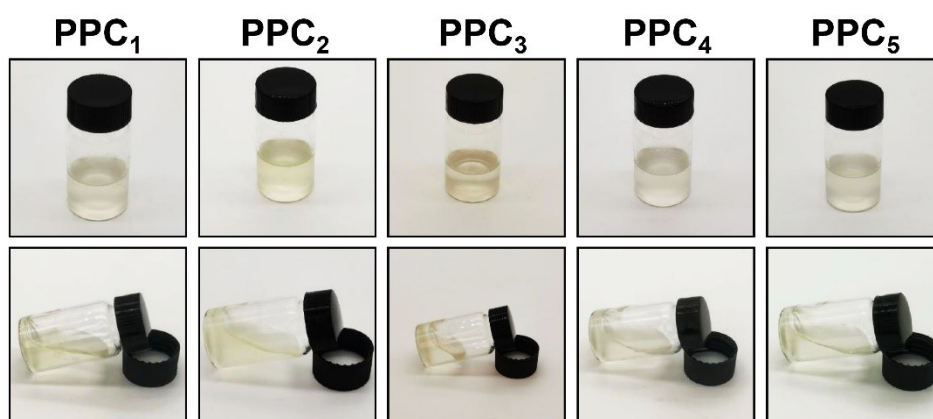

Figure S1. Synthesis of different hydrogels.

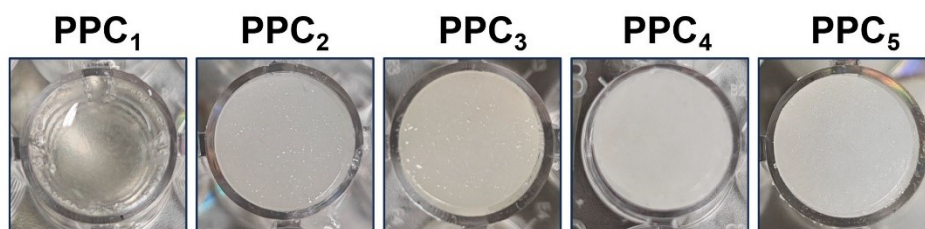

Figure S2. The state after crosslinking of different hydrogels.

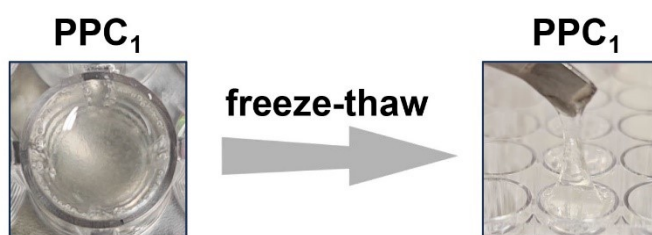

Figure S3. PPC<sub>1</sub> is unable to crosslink by freeze-thaw.

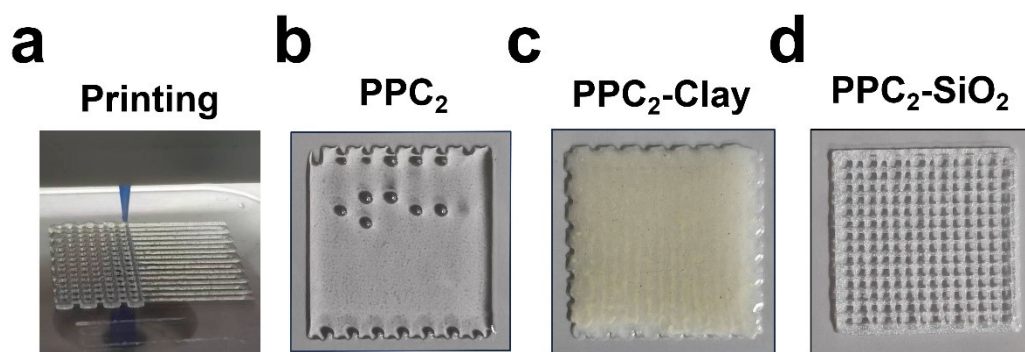

Figure S4. Printing conditions of PPC<sub>2</sub>, PPC<sub>2</sub>-Clay, PPC<sub>2</sub>-SiO<sub>2</sub>.

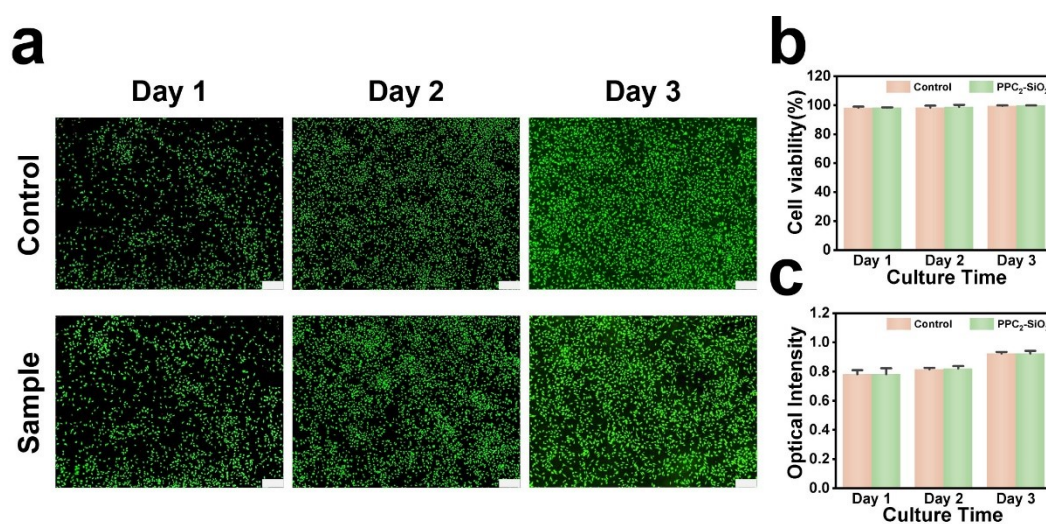

Figure S5. Biocompatibility. (a) Live/Dead cell staining result of the L929 co-culture with extracts. (c) the cell viability values on 1,2,3 days. (d) the alamarblue staining results. Scale bar:200  $\mu$ m.

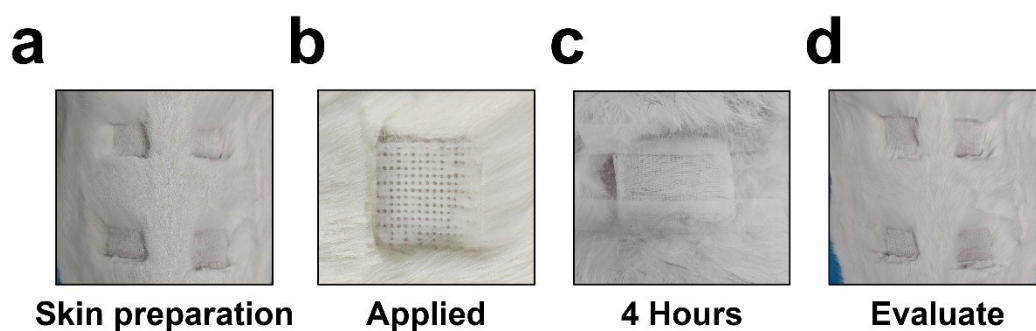

Figure S6. Skin irritation test. (a) Shave the sides of the rabbit's spine. (b) Hydrogel application. (c) Fixed patches for 4 hours. (d) The erythema and edema of the contact points were observed and recorded at 24h, 48h and 72h after contact with hydrogel.

Table S1. Irritation scores and descriptive ratings used in rabbits.

| <b>Descriptive Rating</b> | <b>PII</b> | <b>Descriptive Rating</b> | <b>PII</b> |
|---------------------------|------------|---------------------------|------------|
| Non-irritating            | 0.0        | Moderately Irritating     | 2.0-5.0    |
| Slightly Irritating       | 0.1-1.9    | Severely Irritating       | 5.1-8.0    |

Table S2. Observations for erythema and edema on individual rabbits.

| <b>Obs. Time after Treatment</b> | <b>Test Site</b> | <b>Erythema</b> |   |   | <b>Edema</b> |   |   |
|----------------------------------|------------------|-----------------|---|---|--------------|---|---|
| 24 h                             | RA               | 0               | 0 | 0 | 0            | 0 | 0 |
| 24 h                             | RP               | 0               | 0 | 0 | 0            | 0 | 0 |
| 24 h                             | LA               | 0               | 0 | 0 | 0            | 0 | 0 |
| 24 h                             | LP               | 0               | 0 | 1 | 0            | 0 | 0 |
| 48 h                             | RA               | 0               | 0 | 0 | 0            | 0 | 0 |
| 48 h                             | RP               | 0               | 0 | 0 | 0            | 0 | 0 |
| 48 h                             | LA               | 0               | 0 | 0 | 0            | 0 | 0 |
| 48 h                             | LP               | 0               | 0 | 0 | 0            | 0 | 0 |
| 72 h                             | RA               | 0               | 0 | 0 | 0            | 0 | 0 |
| 72 h                             | RP               | 0               | 0 | 0 | 0            | 0 | 0 |
| 72 h                             | LA               | 0               | 0 | 0 | 0            | 0 | 0 |
| 72 h                             | LP               | 0               | 0 | 0 | 0            | 0 | 0 |

RA–Right Anterior; RP–Right Posterior; LA–Left Anterior; LP–Left Posterior. No erythema to edema occurred during the study period. No other irritation/effect was observed. As a result, the material has no toxic effect on the skin.
